# Supplementary material
Source: publisher site journal article supplement (https://www.dovepress.com/article/supplementary_file/574690/574690%20Revised%20%2509Supplementary%20Table%20S1-2.xlsx)
Supplement: Supplementary file 1 [file 574690%20Revised%20%2509Supplementary%20Table%20S1-2.xlsx]

## Sheet: Sheet1
Table S1：GSEA for gene sets between high and low prediction value groups
ID	setSize	enrichmentScore	NES	pvalue	p.adjust	qvalue
CHIANG_LIVER_CANCER_SUBCLASS_PROLIFERATION_DN	179	-0.959495	-2.85305	1e-10	5.59e-09	4.32e-09
HSIAO_LIVER_SPECIFIC_GENES	248	-0.901419	-2.80154	1e-10	5.59e-09	4.32e-09
CAIRO_HEPATOBLASTOMA_DN	267	-0.912923	-2.75237	1e-10	5.59e-09	4.32e-09
DESERT_PERIPORTAL_HEPATOCELLULAR_CARCINOMA_SUBCLASS_UP	158	-0.938365	-2.70241	1e-10	5.59e-09	4.32e-09
LEE_LIVER_CANCER_SURVIVAL_UP	186	-0.897764	-2.68082	1e-10	5.59e-09	4.32e-09
HOSHIDA_LIVER_CANCER_SUBCLASS_S3	266	-0.871106	-2.62607	1e-10	5.59e-09	4.32e-09
WOO_LIVER_CANCER_RECURRENCE_DN	77	-0.939089	-2.5056	1e-10	5.59e-09	4.32e-09
CAIRO_HEPATOBLASTOMA_CLASSES_DN	214	-0.805649	-2.48197	1e-10	5.59e-09	4.32e-09
REACTOME_BIOLOGICAL_OXIDATIONS	219	-0.766378	-2.38381	1e-10	5.59e-09	4.32e-09
CHIANG_LIVER_CANCER_SUBCLASS_CTNNB1_UP	175	-0.803903	-2.37686	1e-10	5.59e-09	4.32e-09
REACTOME_FATTY_ACID_METABOLISM	177	-0.632471	-1.86744	4.25404e-08	1.39543e-06	1.07899e-06
BUFFA_HYPOXIA_METAGENE	50	0.82054	1.6575	1.2655e-06	3.08337e-05	2.38417e-05
WU_APOPTOSIS_BY_CDKN1A_VIA_TP53	53	0.812371	1.65127	2.60641e-06	5.85161e-05	4.52468e-05
KEGG_GLYCOLYSIS_GLUCONEOGENESIS	61	-0.670388	-1.73532	0.000738007	0.00761356	0.00588708
Table S2：GSVA for gene sets between high and low prediction value groups
ID	logFC	AveExpr	t	P.Value	adj.P.Val	B
HALLMARK_MYC_TARGETS_V1	-0.372845	-0.0172136	-9.48995	2.11e-19	1.06e-17	33.2491
HALLMARK_MYC_TARGETS_V2	-0.36145	-0.0253224	-8.84803	2.9e-17	7.24e-16	28.4036
HALLMARK_BILE_ACID_METABOLISM	0.319357	0.0241487	8.36514	1.01e-15	1.68e-14	24.9093
HALLMARK_DNA_REPAIR	-0.279868	-0.0259257	-8.14504	4.88e-15	6.1e-14	23.3621
HALLMARK_MTORC1_SIGNALING	-0.235774	-0.0349193	-7.18664	3.28e-12	3.28e-11	16.9798
HALLMARK_XENOBIOTIC_METABOLISM	0.263565	0.0154024	7.12878	4.76e-12	3.97e-11	16.6138
HALLMARK_E2F_TARGETS	-0.318419	-0.010776	-6.90952	1.92e-11	1.37e-10	15.2479
HALLMARK_G2M_CHECKPOINT	-0.283996	-0.0154082	-6.44409	3.35e-10	2.09e-09	12.4609
HALLMARK_UNFOLDED_PROTEIN_RESPONSE	-0.215476	-0.0379893	-6.2029	1.38e-09	7.69e-09	11.0785
HALLMARK_UV_RESPONSE_UP	-0.163384	-0.0574535	-5.62665	3.46e-08	1.73e-07	7.95416
HALLMARK_FATTY_ACID_METABOLISM	0.201213	0.0117746	5.58253	4.38e-08	1.99e-07	7.72555
HALLMARK_ADIPOGENESIS	0.178717	-0.0120582	5.37364	1.31e-07	5.47e-07	6.66423
HALLMARK_PEROXISOME	0.174637	-0.00475422	5.20393	3.12e-07	1.2e-06	5.82779
HALLMARK_GLYCOLYSIS	-0.150636	-0.0501506	-5.14798	4.14e-07	1.48e-06	5.55714
HALLMARK_COAGULATION	0.186036	-0.00991531	5.0954	5.37e-07	1.79e-06	5.30517
HALLMARK_PI3K_AKT_MTOR_SIGNALING	-0.148729	-0.0413308	-4.43574	1.19e-05	3.71e-05	2.33956
HALLMARK_SPERMATOGENESIS	-0.118749	-0.0332088	-4.42028	1.27e-05	3.74e-05	2.27448
HALLMARK_REACTIVE_OXYGEN_SPECIES_PATHWAY	-0.157954	-0.0501253	-4.32611	1.92e-05	5.33e-05	1.88254
HALLMARK_MITOTIC_SPINDLE	-0.142793	-0.0250464	-3.52029	0.000480663	0.0012649	-1.15221
HALLMARK_KRAS_SIGNALING_DN	0.0875948	-0.00983818	3.4884	0.000539875	0.00132052	-1.26035
HALLMARK_P53_PATHWAY	-0.106305	-0.0406869	-3.48097	0.000554619	0.00132052	-1.28541
HALLMARK_UV_RESPONSE_DN	0.123222	-0.0229335	3.26247	0.00119922	0.00272551	-1.9998
HALLMARK_WNT_BETA_CATENIN_SIGNALING	-0.118564	-0.0374529	-3.14168	0.00180475	0.00392337	-2.37591
HALLMARK_HEME_METABOLISM	0.0929586	-0.0154336	3.09541	0.00210363	0.00438256	-2.51639
HALLMARK_NOTCH_SIGNALING	-0.115968	-0.0522637	-3.08292	0.00219178	0.00438356	-2.55398
HALLMARK_ALLOGRAFT_REJECTION	-0.114338	-0.013381	-2.61899	0.00915422	0.0176043	-3.84666
